# Supplementary material for: Introducing the Biosimilar Paradigm to Neurology: The Totality of Evidence for the First Biosimilar Natalizumab
Source: PubMed Central journal article supplement — BioDrugs. 2024 Sep 30;38(6):755–67. doi: 10.1007/s40259-024-00671-4 (PMC11530514; doi:10.1007/s40259-024-00671-4), 2024-09-30
Supplement: 40259_2024_671_MOESM1_ESM.pdf [file 40259_2024_671_MOESM1_ESM.pdf]

## **Introducing the biosimilar paradigm to neurology – The totality of evidence for the first biosimilar natalizumab**

### **BioDrugs**

*Krzysztof Selmaj<sup>1</sup>, Karsten Roth<sup>2</sup>, Josef Höfler<sup>3</sup>, Klaus Vitzithum<sup>2</sup>, Rafal Derlacz<sup>2</sup>, Oliver von Richter<sup>4</sup>, Cyrill Hornuss<sup>4</sup>, Johann Poetzl<sup>4</sup>, Barry Singer<sup>5</sup>, Laura Jacobs<sup>4\*</sup>*

<sup>1</sup>Department of Neurology, University of Warmia & Mazury, Olsztyn, and Center of Neurology, Lodz, Poland

<sup>2</sup>Polpharma Biologics S.A., Gdansk, Poland

<sup>3</sup>Staburo GmbH, Munich, Germany

<sup>4</sup>Hexal AG (a Sandoz company), Holzkirchen, Germany

<sup>5</sup>The MS Center for Innovations in Care, Missouri Baptist Medical Center, St Louis, Missouri, USA

\*Corresponding author: Laura Jacobs

Email: [laura.jacobs@sandoz.com](mailto:laura.jacobs@sandoz.com)

**Supplementary figure 1** Fab-arm exchange kinetics in physiologically relevant conditions by FRET

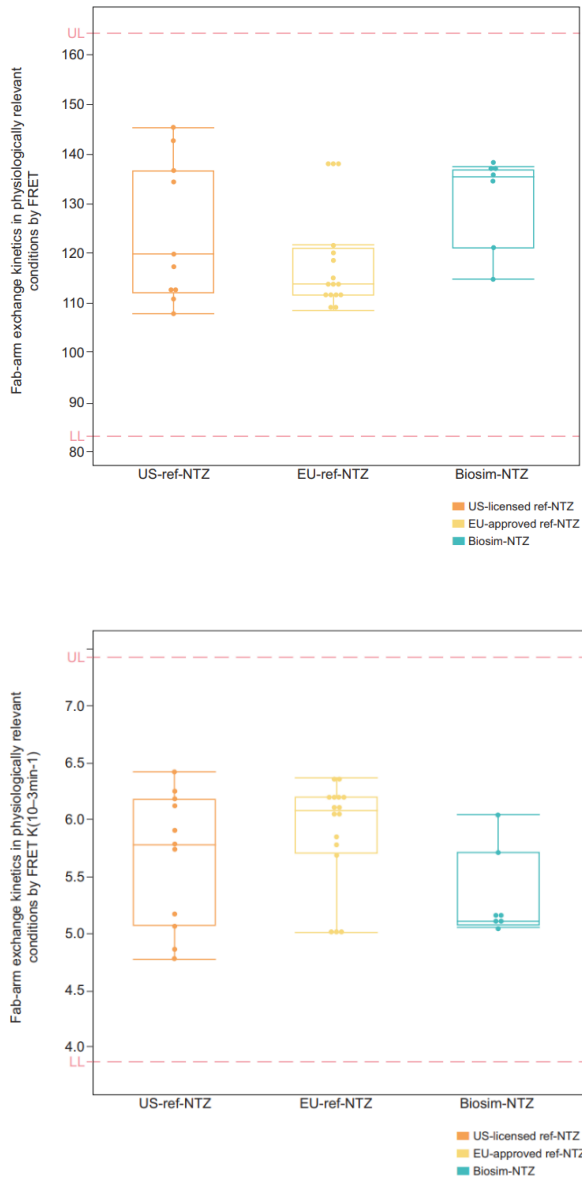

Biosim-NTZ, biosimilar natalizumab; FRET, Förster resonance energy transfer; ref-NTZ, reference natalizumab.

The boxes indicate quartiles and the horizontal line in each box represents the median value; the whiskers show data distribution; the circles represent the individual batches of US-ref-NTZ, EU-ref-NTZ, and biosim-NTZ.

**Supplementary table 1** Fab-arm exchange kinetics in physiologically relevant conditions by FRET

| Sample      | Half-life (min)     |                      |                      | K ( $10^{-3} \text{ min}^{-1}$ ) |                          |                          |
|-------------|---------------------|----------------------|----------------------|----------------------------------|--------------------------|--------------------------|
|             | Biosim-NTZ<br>(n=7) | US-ref-NTZ<br>(n=11) | EU-ref-NTZ<br>(n=16) | Biosim-NTZ<br>(n=7)              | US-<br>ref-NTZ<br>(n=11) | EU-<br>ref-NTZ<br>(n=16) |
| <b>Min</b>  | 114.7               | 108.0                | 108.7                | 5.056                            | 4.778                    | 5.012                    |
| <b>Max</b>  | 137.3               | 145.2                | 138.3                | 6.053                            | 6.424                    | 6.382                    |
| <b>Mean</b> | 130.9               | 123.8                | 118.5                | 5.321                            | 5.665                    | 5.891                    |
| <b>SD</b>   | 9.080               | 13.514               | 10.356               | 0.398                            | 0.595                    | 0.470                    |

Biosim-NTZ, biosimilar natalizumab; FRET, Förster resonance energy transfer; ref-NTZ, reference natalizumab; SD, standard deviation.

**Supplementary table 2** Pivotal PK/PD study %Fab-arm exchange over time

| Scheduled study time/day | Biosim-NTZ |       |      |        | US-ref-NTZ |       |      |        | EU-ref-NTZ |       |       |        |
|--------------------------|------------|-------|------|--------|------------|-------|------|--------|------------|-------|-------|--------|
|                          | n          | nmiss | mean | SD     | n          | nmiss | mean | SD     | n          | nmiss | mean  | SD     |
| <b>Hour 5</b>            | 141        | 1     | 13.8 | 16.400 | 148        | 0     | 15.4 | 13.600 | 146        | 1     | 16.5  | 12.300 |
| <b>Hour 6</b>            | 142        | 0     | 30.6 | 19.700 | 148        | 0     | 31.4 | 16.300 | 146        | 1     | 31.4  | 18.200 |
| <b>Hour 12</b>           | 142        | 0     | 50.6 | 15.000 | 148        | 0     | 51.1 | 13.400 | 147        | 0     | 52.0  | 14.500 |
| <b>Day 2</b>             | 142        | 0     | 60.2 | 14.800 | 147        | 1     | 61.5 | 14.900 | 145        | 2     | 60.9  | 15.100 |
| <b>Day 3</b>             | 141        | 1     | 77.8 | 16.300 | 148        | 0     | 80.9 | 14.000 | 145        | 2     | 79.5  | 14.900 |
| <b>Day 5</b>             | 138        | 4     | 91.2 | 13.800 | 143        | 5     | 93.5 | 11.800 | 142        | 5     | 92.6  | 11.400 |
| <b>Day 8</b>             | 140        | 2     | 95.4 | 8.360  | 148        | 0     | 96.2 | 7.440  | 146        | 1     | 95.9  | 7.160  |
| <b>Day 15</b>            | 140        | 2     | 98.9 | 3.490  | 143        | 5     | 99.3 | 1.400  | 145        | 2     | 99.2  | 1.720  |
| <b>Day 22</b>            | 137        | 5     | 99.6 | 0.533  | 144        | 4     | 99.7 | 0.370  | 143        | 4     | 99.6  | 0.425  |
| <b>Day 29</b>            | 135        | 7     | 99.9 | 0.280  | 142        | 6     | 99.9 | 0.245  | 142        | 5     | 99.9  | 0.272  |
| <b>Day 36</b>            | 139        | 3     | 99.9 | 0.478  | 144        | 4     | 100  | 0.110  | 141        | 6     | 100.0 | 0.196  |
| <b>Day 43</b>            | 134        | 8     | 99.9 | 1.160  | 144        | 4     | 100  | 0.190  | 144        | 3     | 99.9  | 0.348  |

Biosim-NTZ, biosimilar natalizumab; nmiss, number of missing values; PD, pharmacodynamics; PK, pharmacokinetics; ref-NTZ, reference natalizumab; SD, standard deviation.

**Supplementary table 3** Summary of the Antelope study safety and immunogenicity results to Week 48<sup>a</sup>

| Safety population                                        | No. (%)               |                                        |                       |
|----------------------------------------------------------|-----------------------|----------------------------------------|-----------------------|
|                                                          | Biosim-NTZ<br>(n=131) | EU-ref-NTZ/biosim-NTZ switch<br>(n=30) | EU-ref-NTZ<br>(n=103) |
| Any TEAE                                                 | 85 (64.9)             | 22 (73.3)                              | 71 (68.9)             |
| Any related TEAE                                         | 31 (23.7)             | 8 (26.7)                               | 22 (21.4)             |
| Any TEAE ≥Grade 3                                        | 4 (3.1)               | 0                                      | 1 (1.0)               |
| Investigations                                           | 2 (1.5)               | 0                                      | 0                     |
| Musculoskeletal and connective tissue disorders          | 0                     | 0                                      | 1 (1.0)               |
| Respiratory, thoracic, and mediastinal disorders         | 1 (0.8)               | 0                                      | 0                     |
| Skin and subcutaneous tissue disorders                   | 1 (0.8)               | 0                                      | 0                     |
| Any TEAE of special interest                             | 6 (4.6)               | 2 (6.7)                                | 6 (5.8)               |
| Immune system disorders                                  | 0                     | 1 (3.3)                                | 0                     |
| Infections and infestations                              | 2 (1.5)               | 1 (3.3)                                | 5 (4.9)               |
| Investigations                                           | 1 (0.8)               | 0                                      | 0                     |
| Skin and subcutaneous tissue disorders                   | 3 (2.3)               | 0                                      | 1 (1.0)               |
| Any TEAE leading to permanent study drug discontinuation | 8 (6.1) <sup>b</sup>  | 1 (3.3) <sup>c</sup>                   | 3 (2.9) <sup>d</sup>  |
| Any TEAE leading to withdrawal from study <sup>e</sup>   | 0                     | 0                                      | 0                     |
| ADA prevalence at baseline                               | 9 (7)                 | 1 (3)                                  | 7 (7)                 |
| Treatment-emergent ADA positivity, total incidence       | 104 (79)              | 23 (77)                                | 76 (74)               |
| Neutralizing ADA (NAb)                                   | 90 (69)               | 20 (67)                                | 69 (67)               |
| % of ADA positive                                        | 87                    | 87                                     | 91                    |

<sup>a</sup>The number and percentage of patients with TEAEs, AEs of special interest (i.e. PML, John Cunningham virus granule cell neuronopathy, opportunistic infections, liver injury, hypersensitivity, encephalitis, meningitis, and acute retinal necrosis), and serious AEs that occurred after the start of the first infusion and through 4 weeks after the last infusion date of the study drug (visit 13, end of study visit), were summarized by MedDRA system organ class and preferred term overall, by severity, and by relationship to study drug for each treatment group.

<sup>b</sup>Urticaria (n=2); pruritus (n=2); asthenia, hyperhidrosis, blood pressure fluctuations, and dizziness (n=1); trigeminal neuralgia, herpes simplex, and ear infection (n=1); COVID-19 (n=1); hypotension (n=1).

<sup>c</sup>Hypersensitivity (n=1).

<sup>d</sup>Urinary tract infection (n=1); pharyngitis (n=1); urticaria and angioedema (n=1).

<sup>e</sup>A TEAE was considered to lead to withdrawal from the study only if the patient did not proceed to PML follow-up because of this event.

ADA, anti-drug antibody; AE, adverse event; biosim-NTZ, biosimilar natalizumab; COVID-19, coronavirus disease 2019; NAb, neutralizing antibody; PML, progressive multifocal leukoencephalopathy; ref-NTZ, reference natalizumab; TEAE, treatment-emergent adverse event.

Hemmer B, Wiendl H, Roth K, Wessels H, Höfler J, Hornuss C, Liedert B, Selmaj K. Efficacy and Safety of Proposed Biosimilar Natalizumab (PB006) in Patients With Relapsing-Remitting Multiple Sclerosis: The Antelope Phase 3 Randomized Clinical Trial. *JAMA Neurology*. 2023;80:298–307. Reprinted by permission of JAMA Network
